# Supplementary material for: Essential Regression - a generalizable framework for inferring causal latent factors from multi-omic human datasets
Source: bioRxiv or medRxiv preprint supplement (doi:10.1101/2021.05.03.442513), 2021-06-11

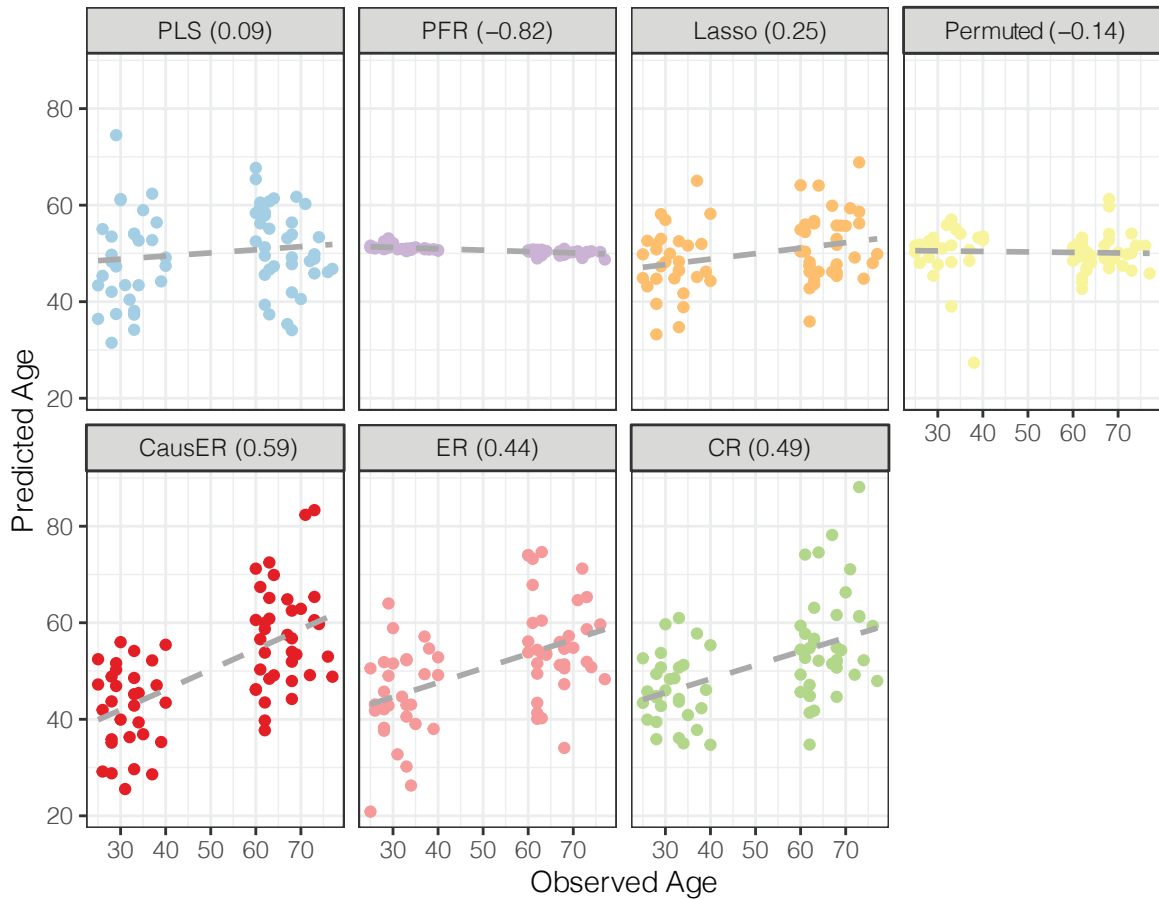

A

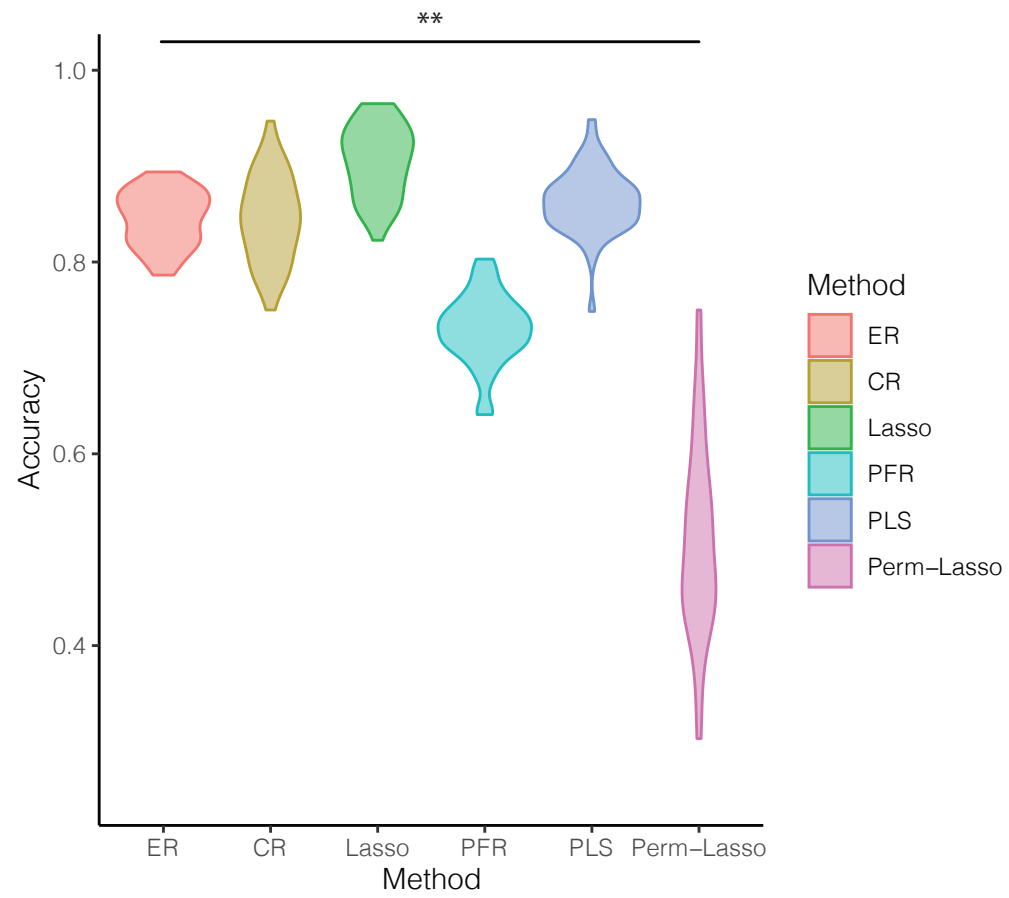

B

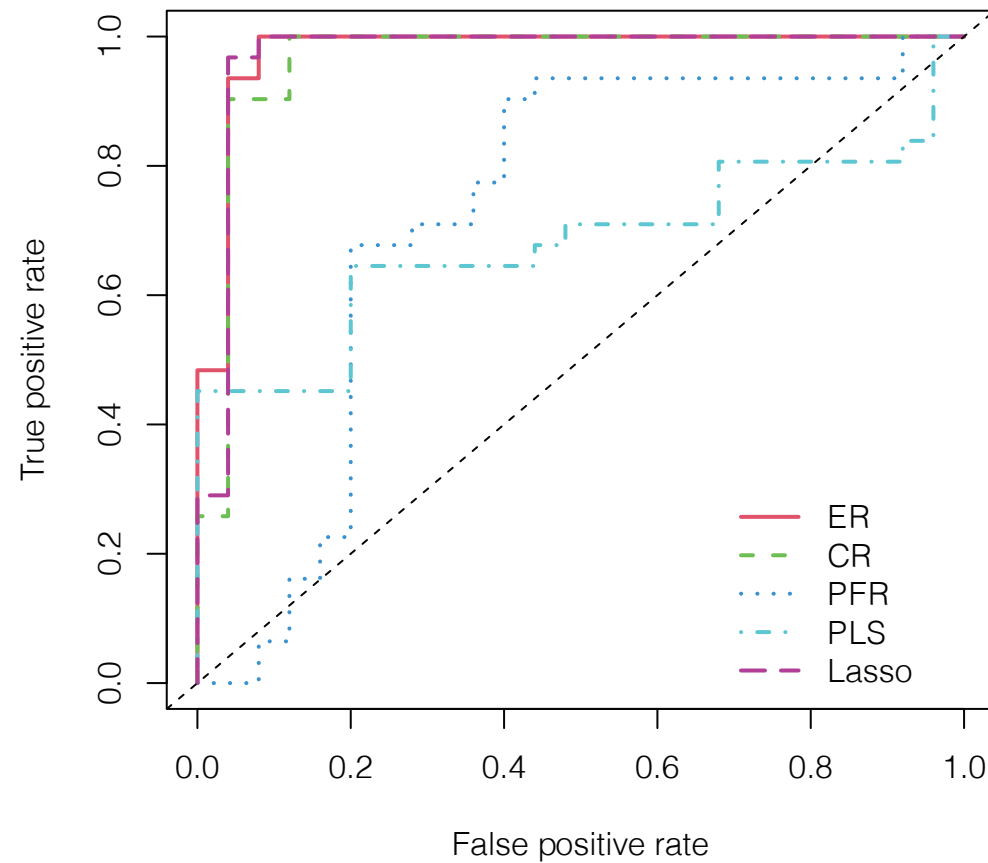

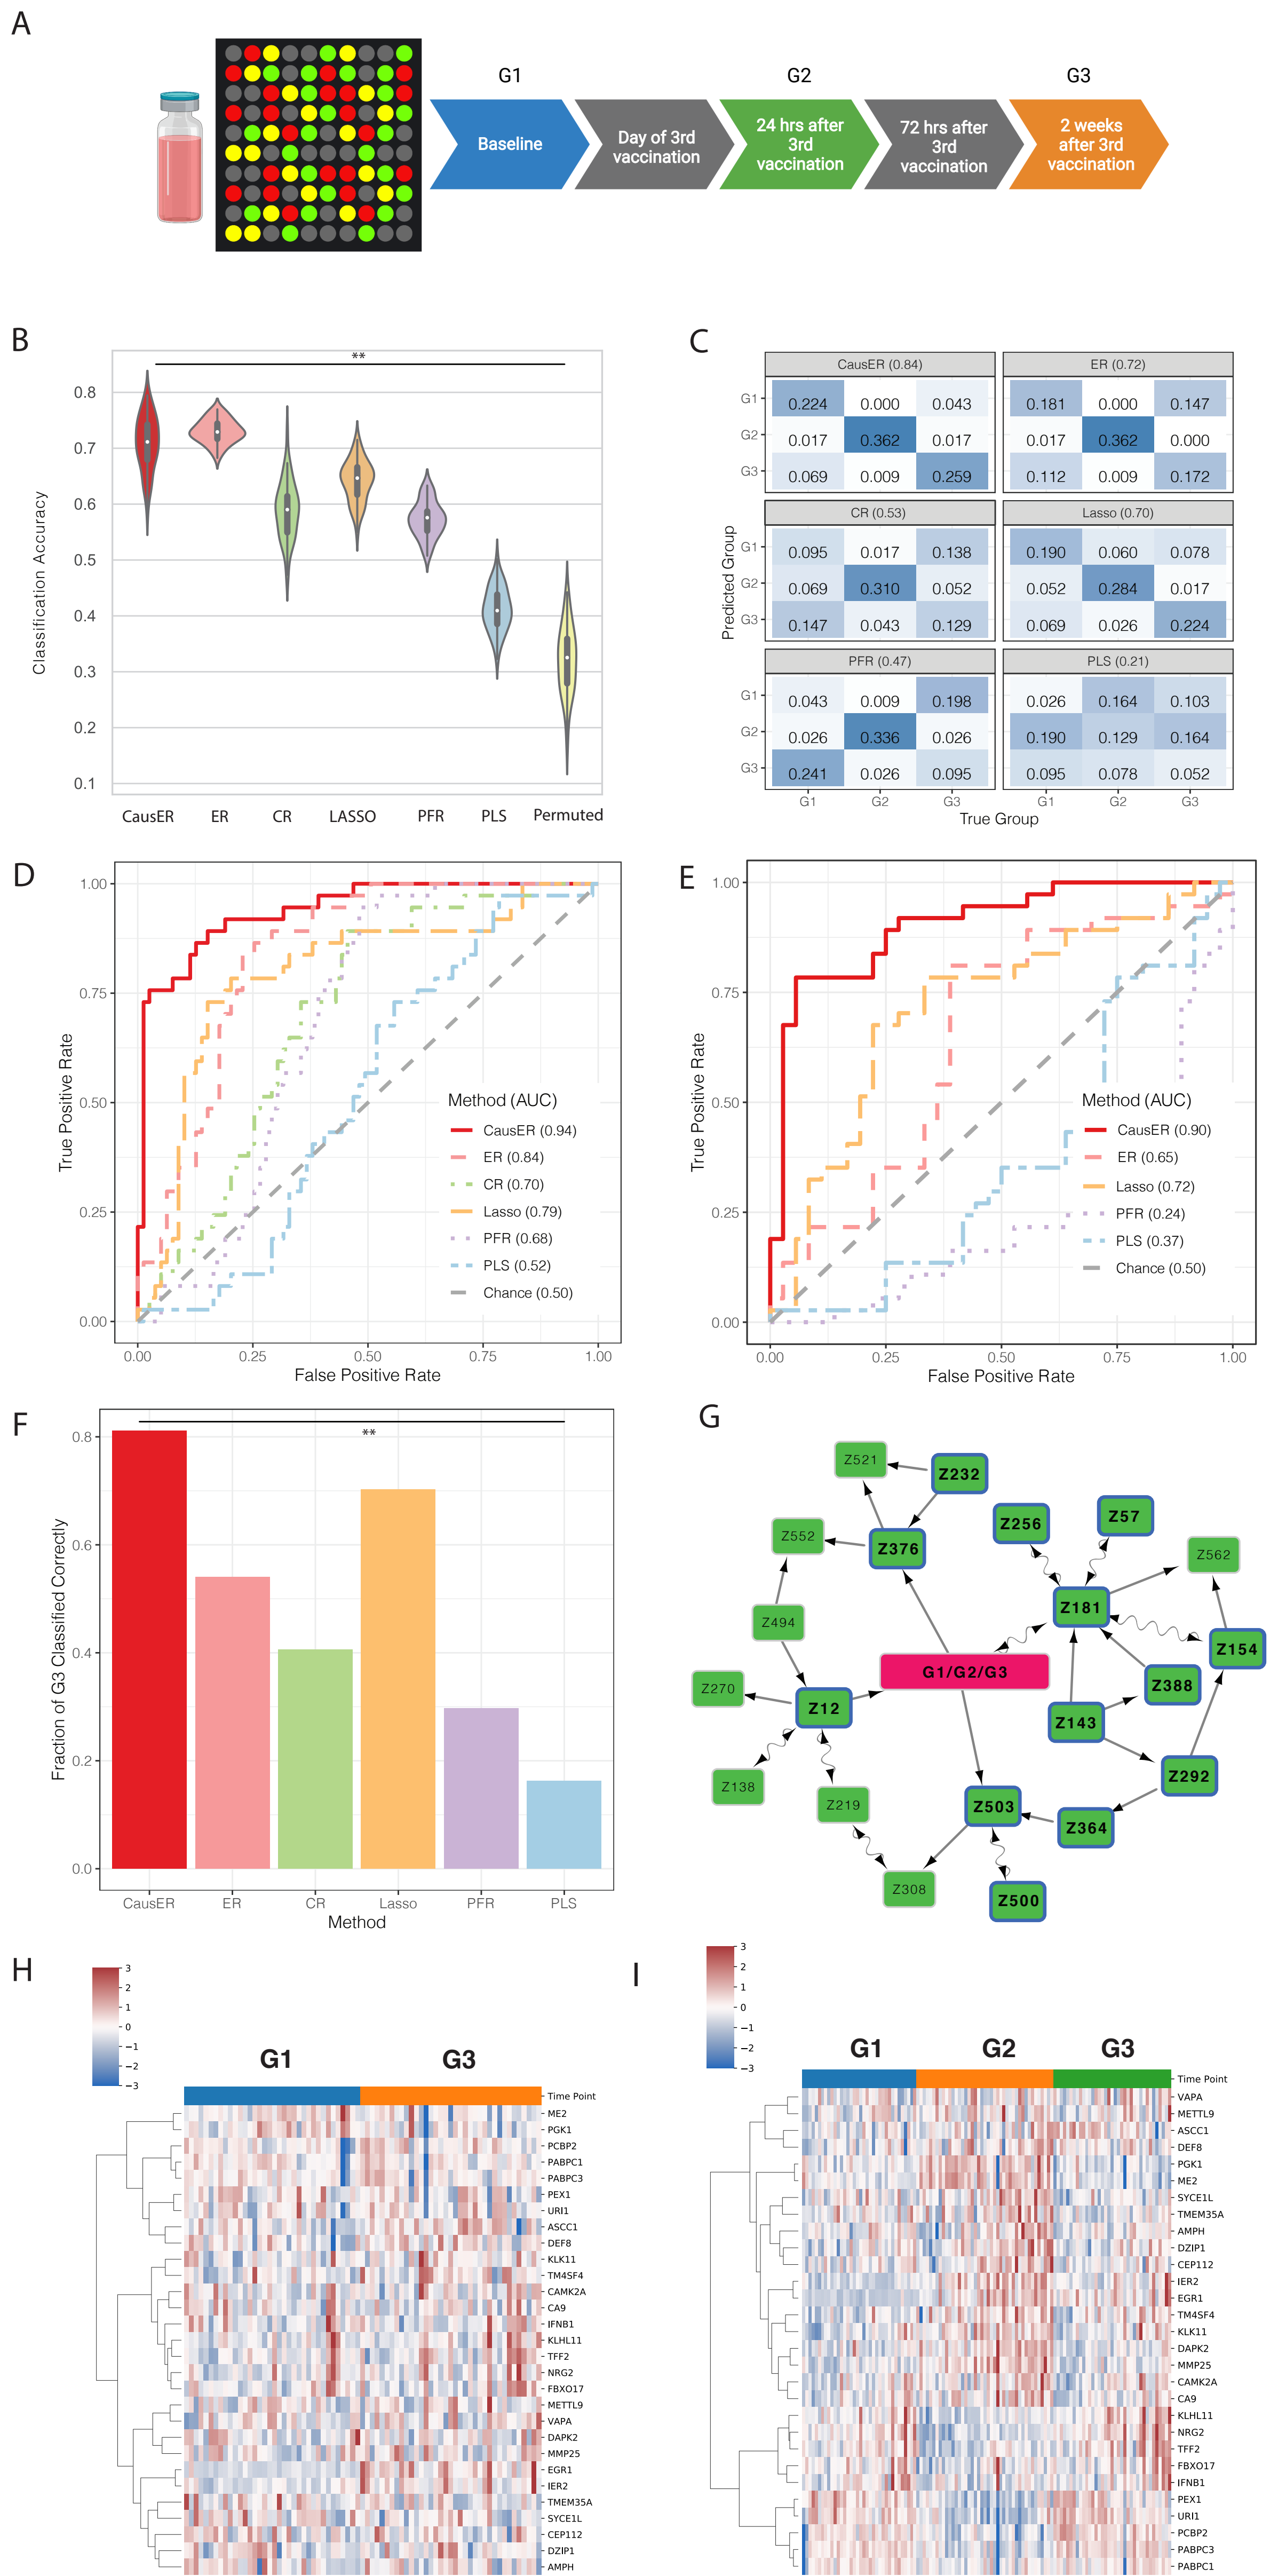

Supplement: Supplementary file [file media-1.pdf]
